CORRECTION

# Correction: Twenty years of gender equality research: A scoping review based on a new semantic indicator

The *PLOS ONE* Staff

## Notice of republication

This article was republished on November 1, 2021 to correct an error in the title. The publisher apologizes for the error. Please download this article again to view the correct version. The originally published, uncorrected article and the republished, corrected article are provided here for reference.

## Supporting information

**S1 File. Originally published, uncorrected article.**

(PDF)

**S2 File. Republished, corrected article.**

(PDF)

## Reference

1. Belingheri P, Chiarello F, Fronzetti Colladon A, Rovelli P (2021) Twenty years of gender equality research: A scoping review based on a new semantic indicator. PLoS ONE 16(9): e0256474. <https://doi.org/10.1371/journal.pone.0256474> PMID: 34547029

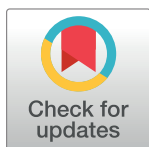

## OPEN ACCESS

**Citation:** The *PLOS ONE* Staff (2021) Correction: Twenty years of gender equality research: A scoping review based on a new semantic indicator. PLoS ONE 16(11): e0259930. <https://doi.org/10.1371/journal.pone.0259930>

**Published:** November 9, 2021

**Copyright:** © 2021 The PLOS ONE Staff. This is an open access article distributed under the terms of the [Creative Commons Attribution License](https://creativecommons.org/licenses/by/4.0/), which permits unrestricted use, distribution, and reproduction in any medium, provided the original author and source are credited.
